# Supplementary material
Source: publisher figshare collection journal article supplement (https://acs.figshare.com/ndownloader/files/5116096)
Supplement: Supplementary file 1 [file 5116096]

# **Controllable synthesis of ZnO nanorod and prism arrays in large-area**

Debao Wang\* and Caixia Song

*College of Chemistry and Molecular Engineering,*

*Qingdao University of Science & Technology,*

*Qingdao 266042, P. R. China*

\*Corresponding author. E-mail: [wangdb@ustc.edu](mailto:wangdb@ustc.edu)

Tel: +86-532-4022787.

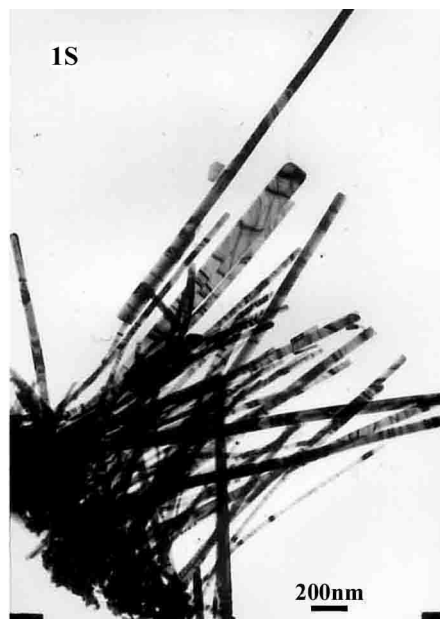

**Figure 1S.** TEM image of ZnO nanorod array in Sample1.

**Figure 2S.** HRTEM image of an individual ZnO nanorod in Sample 1.

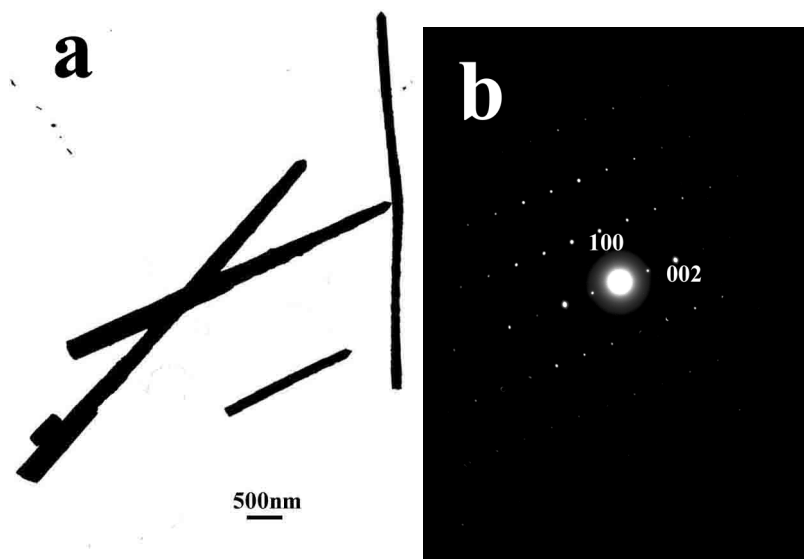

**Figure 3S.** TEM image (a) and corresponding ED pattern (b) of the thinner ZnO nanorods in sample 4.
